# Supplementary material for: Degradable Hollow Mesoporous Silicon/Carbon Nanoparticles for Photoacoustic Imaging-Guided Highly Effective Chemo-Thermal Tumor Therapy in Vitro and in Vivo
Source: PubMed Central journal article supplement — Theranostics. 2017 Jul 22;7(12):3007–20. doi: 10.7150/thno.18460 (PMC5566102; doi:10.7150/thno.18460), 2017-07-22
Supplement: thnov07p3007s1.pdf [file thnov07p3007s1.pdf]

# Supplementary Information

## **Degradable Hollow Mesoporous Silicon/Carbon Nanoparticles for Photoacoustic Imaging-Guided Highly Effective Chemo-Thermal Tumor Therapy *in Vitro* and *in Vivo***

*Jinfeng Zhang*<sup>1, \*</sup>, *Jun Zhang*<sup>3,4, \*</sup>, *Wenyue Li*<sup>2,4</sup>, *Rui Chen*<sup>1</sup>, *Zhenyu Zhang*<sup>2</sup>, *Wenjun Zhang*<sup>2</sup>, *Yongbing Tang*<sup>5</sup>, *Xiaoyuan Chen*<sup>6</sup>, *Gang Liu*<sup>3, Δ</sup>, *Chun-Sing Lee*<sup>1, Δ</sup>

1. Center of Super-Diamond and Advanced Films (COSDAF) & Department of Chemistry, City University of Hong Kong, 83 Tat Chee Avenue, Kowloon, Hong Kong SAR, P. R. China.
2. Center of Super-Diamond and Advanced Films (COSDAF) & Department of Physics and Materials Science, City University of Hong Kong, 83 Tat Chee Avenue, Kowloon, Hong Kong SAR, P. R. China.
3. State Key Laboratory of Molecular Vaccinology and Molecular Diagnostics Center for Molecular Imaging and Translational Medicine, School of Public Health, Xiamen University, Xiamen 361005, P. R. China.
4. Department of Ultrasound, Xijing Hospital, Xi'an, Shaanxi 710032, P. R. China.
5. Functional Thin Films Research Center, Shenzhen Institutes of Advanced Technology, Chinese Academy of Sciences.
6. Laboratory of Molecular Imaging and Nanomedicine (LOMIN), National Institute of Biomedical Imaging and Bioengineering (NIBIB), National Institutes of Health (NIH), MD 20892, USA.

ΔCorresponding authors: [apcslee@cityu.edu.hk](mailto:apcslee@cityu.edu.hk) (C. S. Lee), [gangliu.cmitm@xmu.edu.cn](mailto:gangliu.cmitm@xmu.edu.cn) (G. Liu)

\*These authors contributed equally to this work.

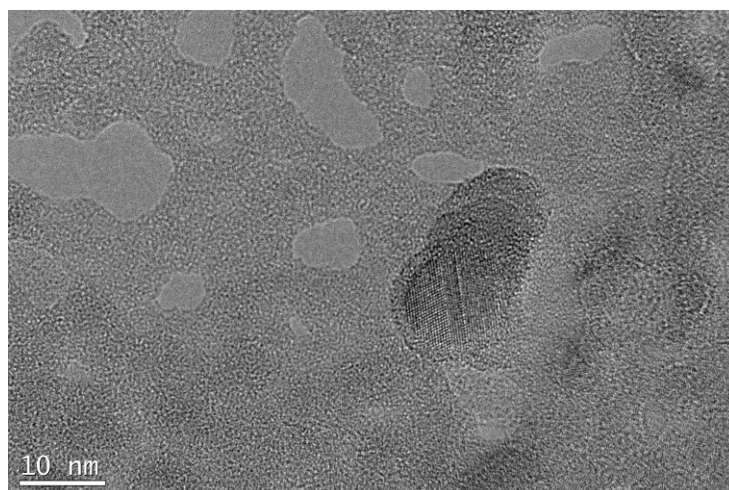

**Figure S1.** HRTEM image of the carbon shell which show pores with the size of 5~15 nm.

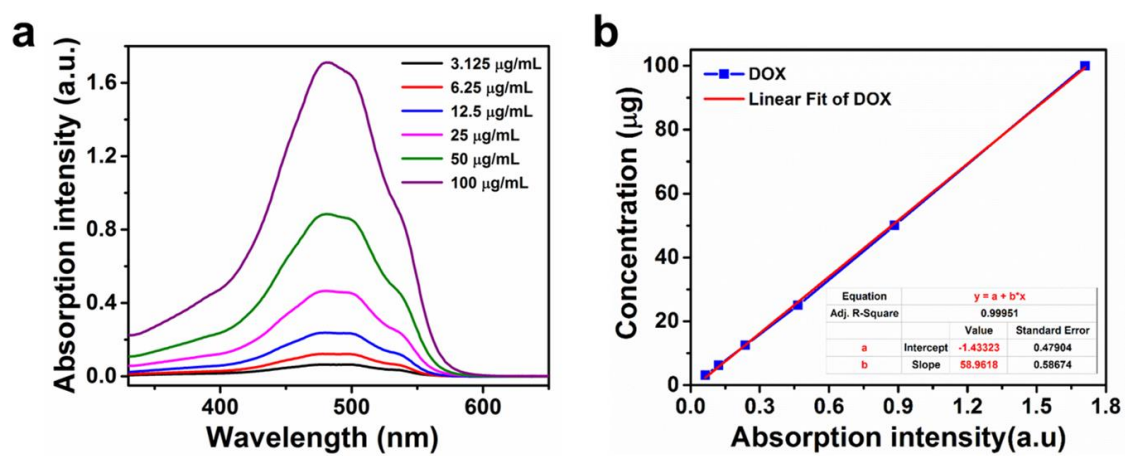

**Figure S2.** a) Standard absorbance curve of DOX; b) The absorbance of DOX molecule at 480 nm as a function of DOX concentration.

| Si/C NPs / DOX Ratio (w / w ) | Drug loading content (%) | Drug encapsulation efficiency (%) |
|-------------------------------|--------------------------|-----------------------------------|
| 5:2                           | 11.6 %                   | 33 %                              |
| 5:4                           | 31.1 %                   | 56.5 %                            |
| 5:8                           | 34.2 %                   | 32.5 %                            |
| 5:12                          | 41.6 %                   | 27.3 %                            |

**Table S1.** Optimizing the drug loading content and drug encapsulation efficiency by varying weight ratios between the Si/C NPs and DOX.

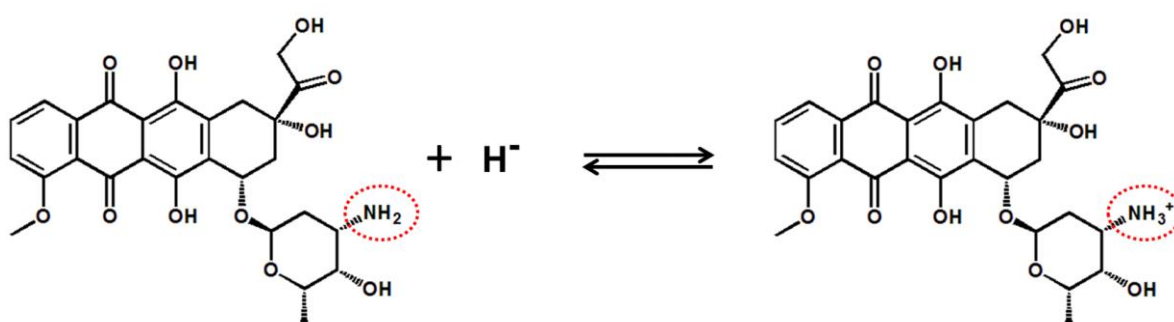

**Figure S3.** Protonation of amine groups on DOX molecule at lower pH (5.0 and 6.2).

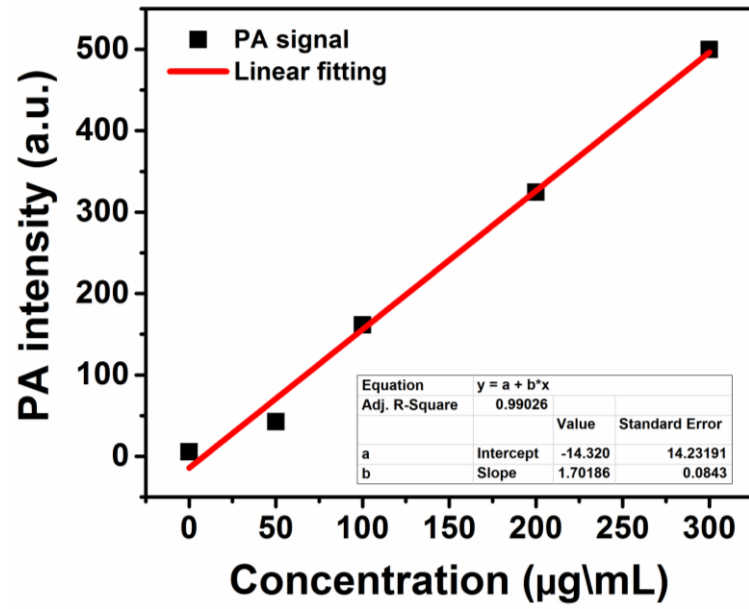

**Figure S4.** The linear relationship between PA signal and concentration of PEG- Si/C -DOX NPs (0, 50, 100, 200, 300, 500 µg/mL, 800 nm laser).
